# Supplementary material
Source: ML conference proceedings conference paper supplement (https://openreview.net/forum?id=eZllW0F5aM_)
Supplement: supplementary_material [file attachment]

# DON'T STACK LAYERS IN GRAPH NEURAL NETWORKS, WIRE THEM RANDOMLY

## SUPPLEMENTARY MATERIAL

**Anonymous authors**

Paper under double-blind review

### 1 PROOF LEMMA 3.1

Let us first consider the number of paths of length  $l$  from node  $k$  to the sink. We define the path length as the number of nodes in the path. In a randomly wired network with  $n$  architecture nodes, we have that the first node of all the paths is node  $k$  and the last one is node  $n$  (i.e., the sink node). Therefore, the minimum path length is 2. If  $l \geq 2$ , the number of all possible paths of length  $l$  between node  $k$  and the sink is  $\binom{n-k-1}{l-2}$ . Since in a path of length  $l$  there are  $l-1$  edges and each edge has probability  $p$  of being generated by the Erdős-Renyi model, each one of the paths of length  $l$  has probability  $p^{l-1}$  of being present in the network. Thus, the expected number of paths with length  $l$  between node  $k$  and the sink is  $\mathbb{E}[N_l^{(k)}] = \binom{n-k-1}{l-2} p^{l-1}$ . If we set  $k = 1$ , we obtain the average number of paths of length  $l$  from source to sink  $\mathbb{E}[N_l] = \binom{n-2}{l-2} p^{l-1}$ . We can now compute the average total number of paths  $\mathbb{E}[N^{(k)}]$  as follows

$$\mathbb{E}[N^{(k)}] = \sum_{l=2}^{n-k+1} \binom{n-k-1}{l-2} p^{l-1} = \sum_{\tilde{l}=0}^{\tilde{n}} \binom{\tilde{n}}{\tilde{l}} p^{\tilde{l}+1} = p \sum_{\tilde{l}=0}^{\tilde{n}} \binom{\tilde{n}}{\tilde{l}} p^{\tilde{l}} = p(1+p)^{\tilde{n}} = p(1+p)^{n-k-1},$$

where  $\tilde{n} = n - k - 1$ ,  $\tilde{l} = l - 2$  and the fourth equality follows from the binomial theorem. If we set  $k = 1$ , we obtain the average total number of paths from source to sink  $\mathbb{E}[N_p] = p(1+p)^{n-2}$ .

### 2 PROOF LEMMA 3.3

From Lemma 3.1, we can compute the average length of the paths from node  $k$  to the sink as follows

$$\mathbb{E}[l^{(k)}] = \sum_{l=2}^{n-k+1} l \mathbb{E} \left[ \frac{N_l^{(k)}}{N^{(k)}} \right] \approx \frac{\sum_{l=2}^{n-k+1} l \mathbb{E}[N_l^{(k)}]}{\mathbb{E}[N^{(k)}]} = \frac{\sum_{l=2}^{n-k+1} \binom{n-k-1}{l-2} p^{l-1} l}{p(1+p)^{n-k-1}}, \quad (1)$$

where we have neglected the higher order terms (Elandt-Johnson & Johnson, 1980). The numerator in (1) can be computed as follows

$$\begin{aligned} \sum_{l=2}^{n-k+1} \binom{n-k-1}{l-2} p^{l-1} l &= \sum_{\tilde{l}=0}^{\tilde{n}} \binom{\tilde{n}}{\tilde{l}} p^{\tilde{l}+1} (\tilde{l}+2) = \sum_{\tilde{l}=0}^{\tilde{n}} \binom{\tilde{n}}{\tilde{l}} p^{\tilde{l}+1} \tilde{l} + 2 \sum_{\tilde{l}=0}^{\tilde{n}} \binom{\tilde{n}}{\tilde{l}} p^{\tilde{l}+1} \\ &= p^2 \sum_{\tilde{l}=0}^{\tilde{n}} \binom{\tilde{n}}{\tilde{l}} p^{\tilde{l}-1} \tilde{l} + 2p \sum_{\tilde{l}=0}^{\tilde{n}} \binom{\tilde{n}}{\tilde{l}} p^{\tilde{l}} = p^2 \tilde{n}(1+p)^{\tilde{n}-1} + 2p(1+p)^{\tilde{n}} \\ &= p^2(n-k-1)(1+p)^{n-k-2} + 2p(1+p)^{n-k-1}, \end{aligned}$$

where  $\tilde{n} = n - k - 1$ ,  $\tilde{l} = l - 2$  and the fourth equality is obtained differentiating with respect to  $p$  the binomial theorem. Then, we obtain

$$\mathbb{E}[l^{(k)}] = \frac{p}{1+p} (n-k-1) + 2.$$

If we consider  $k = 1$ , i.e. the sink, we obtain  $\mathbb{E}[l] = \frac{p}{1+p} (n-2) + 2$ .

### 3 PROOF LEMMA 3.4

From Lemma 3.3, we can compute the average length of the paths going through the edge  $\{i, j\}$  as follows

$$\mathbb{E}[l_{ij}] = \mathbb{E}[l^{n-i+1} + l^j] \approx \frac{p}{1+p}(n - (j - i) - 3) + 4.$$

### 4 MONTECARLO DROPPATH REGULARIZATION

Let us consider two paths  $p_1$  and  $p_2$  with at least one common edge, we can compute the covariance between these two paths as follows:

$$\begin{aligned} \text{Cov}(\lambda_{p_1}, \lambda_{p_2}) &= \mathbb{E}[\lambda_{p_1} \lambda_{p_2}] - \mathbb{E}[\lambda_{p_1}] \mathbb{E}[\lambda_{p_2}] \\ &= \prod_{\{i,j\} \in \mathcal{E}^{p_1}} \omega_{ij} \prod_{\{i,j\} \in \mathcal{E}^{p_2}} \omega_{ij} \mathbb{E} \left[ \prod_{\{i,j\} \in \mathcal{I}(p_1, p_2)} z_{ij}^2 \prod_{\{i,j\} \in \mathcal{D}(p_1, p_2)} z_{ij} \right] \\ &\quad - \prod_{\{i,j\} \in \mathcal{E}^{p_1}} \omega_{ij} \prod_{\{i,j\} \in \mathcal{E}^{p_2}} \omega_{ij} \mathbb{E} \left[ \prod_{\{i,j\} \in \mathcal{E}^{p_1}} z_{ij} \right] \mathbb{E} \left[ \prod_{\{i,j\} \in \mathcal{E}^{p_2}} z_{ij} \right] = 0, \end{aligned}$$

where  $\mathcal{I}(p_1, p_2) = \mathcal{E}^{p_1} \cap \mathcal{E}^{p_2}$ ,  $\mathcal{D}(p_1, p_2) = (\mathcal{E}^{p_1} \cup \mathcal{E}^{p_2}) - (\mathcal{E}^{p_1} \cap \mathcal{E}^{p_2})$ ,  $\lambda_{p_1} = \prod_{\{i,j\} \in p_1} z_{ij} \omega_{ij}$ ,  $\lambda_{p_2} = \prod_{\{i,j\} \in p_2} z_{ij} \omega_{ij}$ ,  $z_{ij} \sim \text{Bernoulli}(1 - p_{\text{drop}})$ , and we have assumed all  $\omega_{ij}$  deterministic.

### 5 EXPERIMENTAL DETAILS

Table 1 shows the chosen hyperparameters for the various experiments. The number of parameters refers to one realization of the random architecture graph. The values of the hyperparameters that do not depend on the random architecture are the same for the baseline architectures.

Training has been performed on a workstation with an AMD Ryzen 3700X CPU, 64 GB of RAM and a Titan RTX GPU. Training times can vary run-to-run due to the convergence criterion of no improvement over the validation loss after reaching the minimum learning rate. Training the random architecture is roughly 5% slower than training the baseline.

### 6 EXPERIMENTAL RECEPTIVE FIELD RADIUS

Table 2 shows the average radius of the receptive field obtained in the experiments. In particular, we compare its value at initialization and the value after training. We remark that the average receptive field radius is computed as:

$$\bar{\rho} = \frac{\sum_{l=2}^n l \rho_l}{\sum_{l=2}^n \rho_l}$$

We can notice how the CLUSTER experiment clearly favours larger receptive fields, already optimizing a larger radius even without the sequential path. We can also see how the sequential path promotes a further increases the optimal radius. We remark that the baseline ResNets have a fixed radius equal to 17.

### 7 ADDITIONAL RESULTS

Table 3 reports the results on the ENZYMES dataset, a historically relevant dataset. As it can be noticed and reported in recent literature, this dataset is inadequate to assess relative performance of graph neural network architectures. The large standard deviations due to small dataset size and train/test splits do not allow to infer any meaningful ranking of the proposed method with respect to the ResNet baseline.

Finally, Table 4 reports the results for  $L = 4$  layers, used in the paper to compute the average gains when capacity is increased.

Table 1: Experimental setting

| Dataset | Model       | Hyperparameters     |                   |          |          |             |          |     |        |            |               | others |        |                                                          |
|---------|-------------|---------------------|-------------------|----------|----------|-------------|----------|-----|--------|------------|---------------|--------|--------|----------------------------------------------------------|
|         |             | batch size (L=8,16) | batch size (L=32) | start lr | end lr   | hidden feat | out feat | p   | p_drop | sequential | #params (L=8) |        |        | #params (L=16)                                           |
| ZINC    | R-GCN       | 128                 | 128               | 1.00E-03 | 1.00E-05 | 145         | 145      | 0.6 | 0      | true       | 188931        | 360661 | 704235 | readout:mean                                             |
|         | R-GIN       | 128                 | 128               | 1.00E-03 | 1.00E-05 | 110         | 110      | 0.6 | 0      | true       | 204745        | 406330 | 809632 | nnlpGIN:2; learnpsGIN:True; neighborGIN:sum; readout:sum |
|         | R-GatedGCN  | 128                 | 128               | 1.00E-03 | 1.00E-05 | 70          | 70       | 0.6 | 0      | true       | 206427        | 407711 | 810071 | edgefeat:False; readout:mean                             |
|         | R-GraphSage | 128                 | 128               | 1.00E-03 | 1.00E-05 | 108         | 108      | 0.6 | 0      | true       | 199655        | 388924 | 767565 | sageaggregator:meanpool; readout:mean                    |
| CLUSTER | R-GAT       | 128                 | 128               | 1.00E-03 | 1.00E-05 | 144         | 144      | 0.6 | 0      | true       | 183444        | 358193 | 699399 | nheads:8; readout:mean                                   |
|         | R-GCN       | 128                 | 48                | 1.00E-03 | 1.00E-05 | 146         | 146      | 0.6 | 0.01   | true       | 188683        | 362787 | 711065 | readout:mean                                             |
|         | R-GIN       | 128                 | 48                | 1.00E-03 | 1.00E-05 | 110         | 110      | 0.6 | 0.01   | true       | 207430        | 413455 | 825635 | nnlpGIN:2; learnpsGIN:True; neighborGIN:sum; readout:sum |
|         | R-GatedGCN  | 128                 | 48                | 1.00E-03 | 1.00E-05 | 70          | 70       | 0.6 | 0.01   | true       | 204899        | 406043 | 808573 | edgefeat:False; readout:mean                             |
| CIFAR10 | R-GraphSage | 128                 | 48                | 1.00E-03 | 1.00E-05 | 106         | 106      | 0.6 | 0.01   | true       | 190315        | 372687 | 737557 | sageaggregator:meanpool; readout:mean                    |
|         | R-GAT       | 128                 | 48                | 1.00E-03 | 1.00E-05 | 19          | 152      | 0.6 | 0.01   | true       | 205564        | 395317 | 774934 | nheads:8; readout:mean                                   |
|         | R-GCN       | 128                 | 128               | 1.00E-03 | 1.00E-05 | 146         | 146      | 0.6 | 0.01   | false      | 188686        | 362769 | 711058 | readout:mean                                             |
|         | R-GIN       | 128                 | 128               | 1.00E-03 | 1.00E-05 | 110         | 110      | 0.6 | 0.01   | false      | 211316        | 420893 | 840177 | nnlpGIN:2; learnpsGIN:True; neighborGIN:sum; readout:sum |
| ENZYMES | R-GatedGCN  | 128                 | 128               | 1.00E-03 | 1.00E-05 | 70          | 70       | 0.6 | 0.01   | false      | 204927        | 406029 | 808553 | edgefeat:False; readout:mean                             |
|         | R-GraphSage | 128                 | 128               | 1.00E-03 | 1.00E-05 | 108         | 108      | 0.6 | 0.01   | false      | 197540        | 387651 | 765442 | sageaggregator:meanpool; readout:mean                    |
|         | R-GAT       | 128                 | 128               | 1.00E-03 | 1.00E-05 | 19          | 152      | 0.6 | 0.01   | false      | 205579        | 395304 | 774929 | nheads:8; readout:mean                                   |
|         | R-GCN       | 128                 | 128               | 1.00E-03 | 1.00E-05 | 128         | 128      | 0.6 | 0      | false      | 147122        | 281318 | 537923 | readout:mean                                             |
| ENZYMES | R-GIN       | 128                 | 128               | 1.00E-03 | 1.00E-05 | 96          | 96       | 0.6 | 0      | false      | 160688        | 319010 | 633316 | nnlpGIN:2; learnpsGIN:True; neighborGIN:sum; readout:sum |
|         | R-GatedGCN  | 128                 | 128               | 1.00E-03 | 1.00E-05 | 64          | 64       | 0.6 | 0      | false      | 173614        | 342166 | 679512 | edgefeat:False; readout:mean                             |
|         | R-GraphSage | 128                 | 128               | 1.00E-03 | 1.00E-05 | 96          | 96       | 0.6 | 0      | false      | 157578        | 307390 | 607124 | sageaggregator:meanpool; readout:mean                    |
|         | R-GAT       | 128                 | 128               | 1.00E-03 | 1.00E-05 | 16          | 128      | 0.6 | 0      | false      | 148146        | 283366 | 553916 | nheads:8; readout:mean                                   |

Table 2: Experimental average receptive field radius

|         | R-GatedGCN |           | + Sequential |           | + DropPath |           | + Sequential<br>+ DropPath |           |
|---------|------------|-----------|--------------|-----------|------------|-----------|----------------------------|-----------|
|         | Init       | Optimized | Init         | Optimized | Init       | Optimized | Init                       | Optimized |
| ZINC    | 9.26       | 9.80      | 12.57        | 13.28     | -          | -         | -                          | -         |
| CLUSTER | 9.26       | 10.44     | 12.57        | 14.87     | -          | -         | 12.58                      | 14.89     |
| CIFAR10 | 9.26       | 9.93      | -            | -         | 9.21       | 9.94      | -                          | -         |

Table 3: ENZYMES Accuracy.

|                    | $L = 8$          | $L = 16$         | $L = 32$         |
|--------------------|------------------|------------------|------------------|
| GCN                | $63.46 \pm 4.81$ | $64.75 \pm 6.40$ | $65.50 \pm 6.10$ |
| <b>R-GCN</b>       | $66.67 \pm 7.32$ | $66.71 \pm 7.53$ | $68.17 \pm 6.34$ |
| GIN                | $65.04 \pm 6.35$ | $63.77 \pm 5.96$ | $61.17 \pm 6.06$ |
| <b>R-GIN</b>       | $67.88 \pm 6.27$ | $63.75 \pm 5.73$ | $63.00 \pm 8.46$ |
| GatedGCN           | $68.04 \pm 6.58$ | $68.67 \pm 6.70$ | $69.33 \pm 7.64$ |
| <b>R-GatedGCN</b>  | $68.03 \pm 5.59$ | $67.33 \pm 5.64$ | $68.17 \pm 4.96$ |
| GraphSage          | $68.04 \pm 5.47$ | $69.08 \pm 5.17$ | $68.50 \pm 5.84$ |
| <b>R-GraphSage</b> | $68.33 \pm 4.91$ | $69.13 \pm 5.32$ | $66.17 \pm 3.42$ |
| GAT                | $69.63 \pm 5.21$ | $68.83 \pm 4.66$ | $68.67 \pm 6.66$ |
| <b>R-GAT</b>       | $66.67 \pm 4.33$ | $65.33 \pm 3.06$ | $64.00 \pm 2.91$ |

Table 4:  $L = 4$  performance.

|                    | $L = 4$           |                  |                  |
|--------------------|-------------------|------------------|------------------|
|                    | ZINC              | CLUSTER          | CIFAR            |
| GCN                | $0.469 \pm 0.002$ | $48.68 \pm 3.47$ | $54.28 \pm 0.35$ |
| <b>R-GCN</b>       | $0.509 \pm 0.015$ | $50.82 \pm 5.37$ | $55.31 \pm 0.25$ |
| GIN                | $0.418 \pm 0.002$ | $42.35 \pm 6.10$ | $48.64 \pm 2.29$ |
| <b>R-GIN</b>       | $0.411 \pm 0.009$ | $45.04 \pm 3.95$ | $46.68 \pm 6.14$ |
| GatedGCN           | $0.368 \pm 0.007$ | $48.96 \pm 6.00$ | $69.26 \pm 0.36$ |
| <b>R-GatedGCN</b>  | $0.364 \pm 0.007$ | $51.18 \pm 8.27$ | $68.55 \pm 0.03$ |
| GraphSage          | $0.428 \pm 0.007$ | $47.17 \pm 6.78$ | $66.14 \pm 0.21$ |
| <b>R-GraphSage</b> | $0.429 \pm 0.010$ | $47.86 \pm 5.63$ | $65.02 \pm 0.47$ |
| GAT                | $0.464 \pm 0.005$ | $52.88 \pm 1.74$ | $65.72 \pm 0.54$ |
| <b>R-GAT</b>       | $0.502 \pm 0.019$ | $53.57 \pm 1.67$ | $65.32 \pm 0.79$ |

## REFERENCES

Regina C Elandt-Johnson and Norman L Johnson. *Survival models and data analysis*, volume 110. John Wiley & Sons, 1980.
